# Supplementary material
Source: PubMed Central journal article supplement (PMC9197874)
Supplement: NIHMS1795285-supplement-1.pdf [file NIHMS1795285-supplement-1.pdf]

## Supplemental Tables and Figures

Supplemental Table 1. Descriptive statistics of motor functional, self-report, and neurological baseline measures entered into predictive model selection process. Fugl-Meyer Total Score was not included.

| Measure                                               | Mean  | Std Deviation | Observed Range |
|-------------------------------------------------------|-------|---------------|----------------|
| <i>Fugl-Meyer (FM) Upper Extremity Scores</i>         |       |               |                |
| Total Score (0-66)                                    | 19.8  | 9.62          | 10 - 45.5      |
| Proprioception Score (0-6)                            | 4.8   | 1.82          | 0 - 6          |
| <i>Wolf Motor Function Test (WMFT)</i>                |       |               |                |
| Time (0-120 sec)                                      | 85    | 40.1          | 6.4 - 120      |
| Score (0-5)                                           | 1.7   | 0.89          | 0.8 - 4.1      |
| <i>Action Research Arm Test (ARAT) – Affected Arm</i> |       |               |                |
| Total (0-57)                                          | 14.1  | 14.67         | 0 - 53.5       |
| <i>Grip Strength</i>                                  |       |               |                |
| Paretic Hand (kg)                                     | 9.9   | 8.68          | 0 - 36.3       |
| Non-Paretic Hand (kg)                                 | 31.1  | 11.31         | 13.7 - 65.3    |
| SAFE Score (0-10)                                     | 4.9   | 2.09          | 2 - 9          |
| <i>Stroke Impact Scale (SIS)</i>                      |       |               |                |
| Hand Function (0-100)                                 | 20    | 27.1          | 0 - 95         |
| Overall Score (0-800)                                 | 506   | 102.6         | 302 - 688      |
| ACEQ Anticipated Improvement (0-100)                  | 60    | 28.4          | 10 - 100       |
| TMS Score* - Paretic Arm (0-9)                        | 2.4   | 2.80          | 0 - 9          |
| Lesion Volume (mm <sup>3</sup> )**                    | 55949 | 108037        | 224 - 496,787  |
| <i>Corticospinal Tract (CST) – Affected Side</i>      |       |               |                |
| Percent Lesioned                                      | 21.6% | 18.29         | 0 - 61.23%     |
| Fractional Anisotropy (FA)                            | 0.371 | 0.056         | 0.208 - 0.462  |
| Mean Diffusivity (MD)                                 | 0.724 | 0.104         | 0.541 - 1.025  |

Note. \*n=34 participants had baseline TMS measures. \*\*n=36 participants had MRI measures.

Sup. Table 2. Number of participants per genotype.

| Category <sup>+</sup> | COMT SNP | BDNF SNP | Klotho SNP | DAT repeats |
|-----------------------|----------|----------|------------|-------------|
| 0                     | 12       | 39       | 26         | 24          |
| 1 (heterozygous)      | 21       | 2        | 14         | 10          |
| 2                     | 9        | 0        | 2          | 3           |
| 3+4                   | --       | --       | --         | 3           |

Note. <sup>+</sup>Categories for COMT, rs4680 SNP: 0=GG, 1=AG, 2=AA, n=42; BDNF, rs6265 SNP: 0=CC, 1=CT, 2=TT, n=41; Klotho, rs95363614 SNP: 0=TT, 1=GT, 2=GG, n=42; DAT1, number of repeats: 0=10,10, 1=10,9, 2=9,9, 3=10,4, 4=11,10, n=40. Genetic variables were dummy-coded and included as potential predictors in the predictive model.

Supplemental Table 3. MRI measures for Responders and Non-Responders: Means (Standard Deviations)

| <b>Measure*</b>                                  | <b>Responders (n=14)</b> | <b>Non-Responders (n=22)</b> |
|--------------------------------------------------|--------------------------|------------------------------|
| Lesion Volume (mm <sup>3</sup> )                 | 24595 (33901)            | 75902 (132926)               |
| Center of Gravity (MNI coordinates)              | 34.6, -14.4, 23.8        | 34.3, -15.0, 21.8            |
| <i>Corticospinal Tract (CST) – Affected Side</i> |                          |                              |
| Percent Lesioned                                 | 16.8% (16.13)            | 24.6% (19.28)                |
| Fractional Anisotropy (FA)                       | 0.389 (0.040)            | 0.360 (0.063)                |
| Mean Diffusivity (MD)                            | 0.695 (0.092)            | 0.742 (0.109)                |

Note. \*A total of n=36 participants completed MRIs.

Supplemental Figures

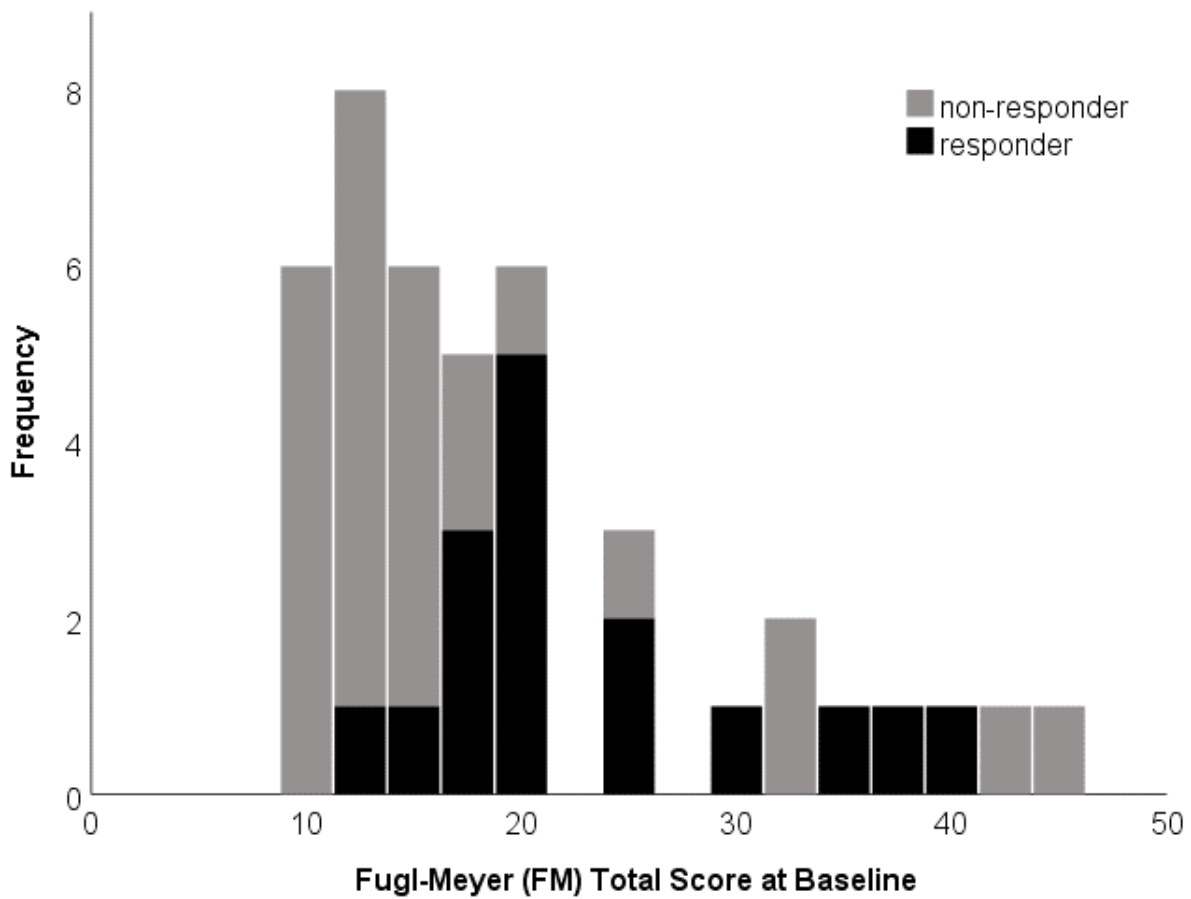

**Supplemental Figure 1.** Histogram of Fugl-Meyer (FM) total scores at Baseline for responders to therapy (change in FM score  $\geq$  5 points) and non-responders.
